# Supplementary material for: A cytosolic invertase is required for normal growth and cell development in the model legume, Lotus japonicus
Source: PubMed Central journal article supplement — J Exp Bot. 2009 May 27;60(12):3353–65. doi: 10.1093/jxb/erp169 (PMC2724688; doi:10.1093/jxb/erp169), 2009-05-27
Supplement: erp169_1.pdf [file erp169_1.pdf]

**Title:** A cytosolic invertase is required for normal growth and cell development in the model legume, *Lotus japonicus*.

**Authors:** Tracey Welham<sup>1</sup>, Jodie Pike<sup>2</sup>, Irmtraud Horst<sup>1,6</sup>, Emmanouil Fletmetakis<sup>3</sup>, Panagiotis Katinakis<sup>3</sup>, Takakazu Kaneko<sup>4</sup>, Shusei Sato<sup>4</sup>, Satoshi Tabata<sup>4</sup>, Jillian Perry<sup>1</sup>, Martin Parniske<sup>5</sup>, Trevor L. Wang<sup>1</sup>

## Supplementary Files

### Figures

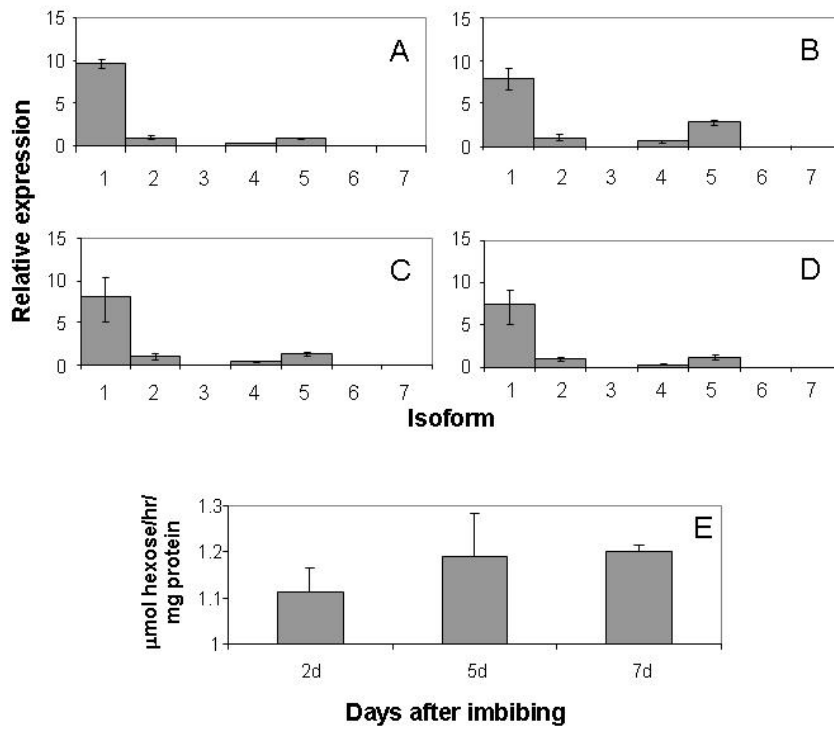

**Figure S1.** Expression of *LjINV* genes and enzyme activities during seedling growth. Relative abundance of different N/A invertase transcripts. The relative amounts of *LjINV1* to *LjINV7* were analysed by qRT-PCR in whole seedlings (3 replicates) aged: A, 2 days; B, 5 days; C, 7 days; D, 9 days. E, N/A enzyme activity in whole seedlings (3 replicates) at different ages. Transcript levels were expressed relative to the level in *LjINV2* after normalization to the levels of *LjEF-1α*. Note the asymmetrical distribution of the SD caused by the conversion of the exponential process into a linear comparison (Livak and Schmittgen, 2001).

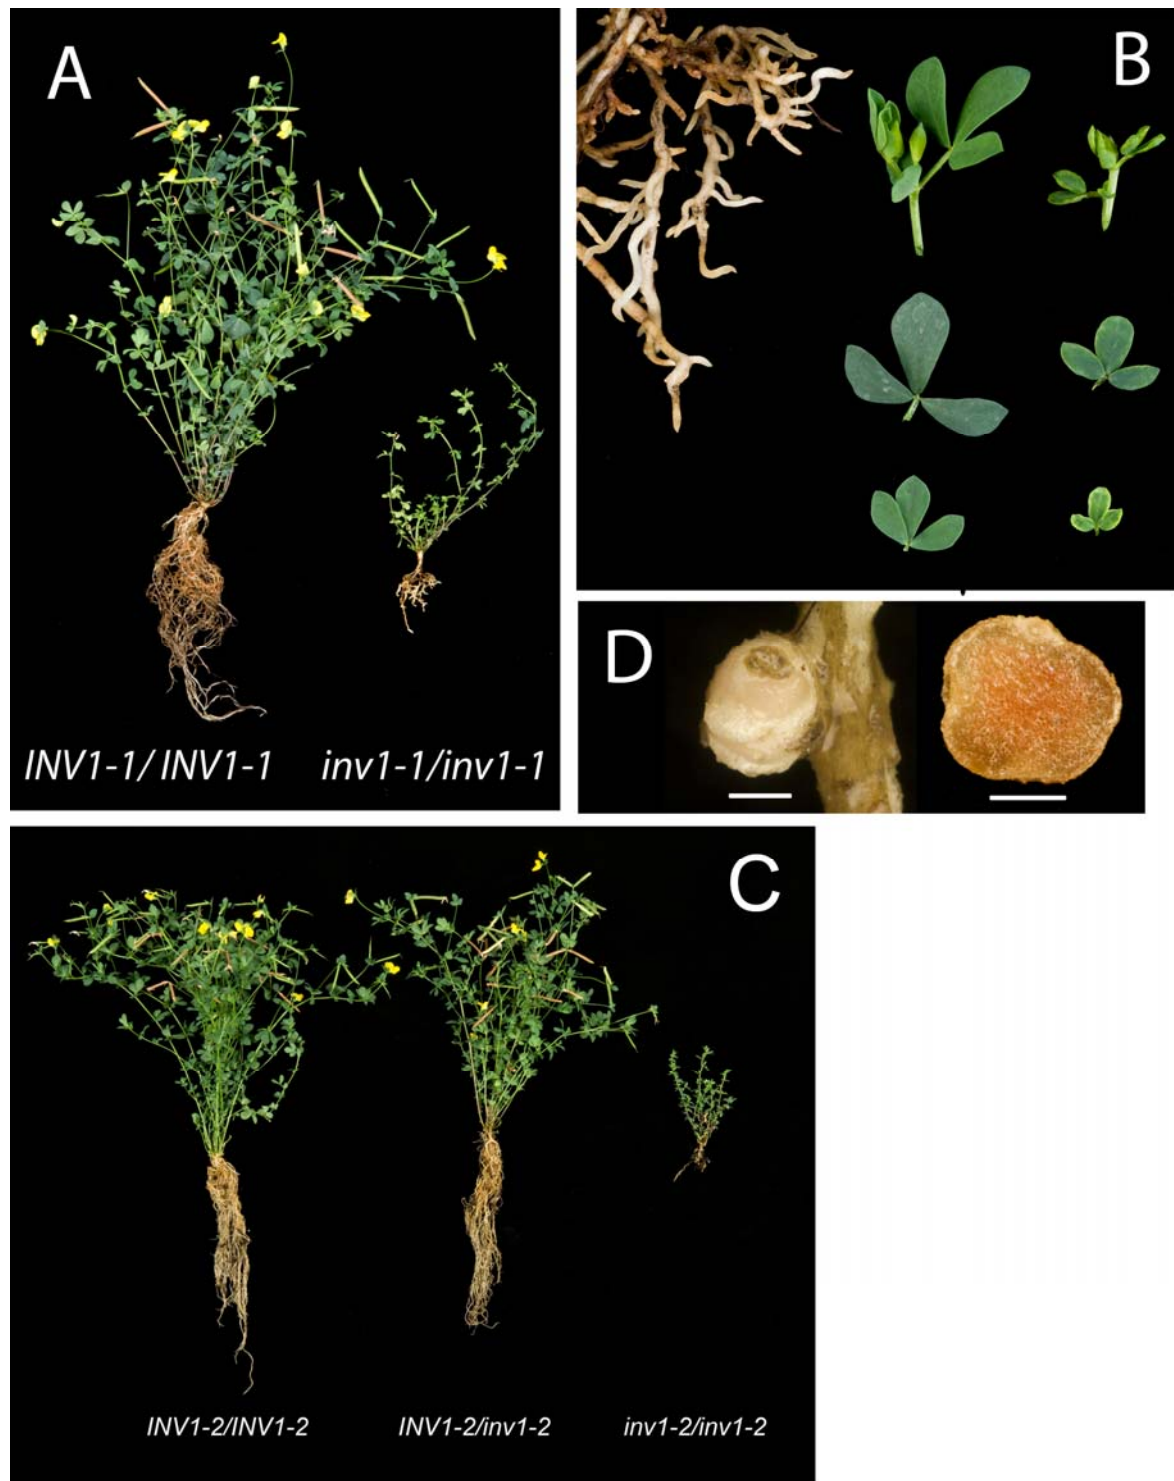

**Figure S2.** Colour plate of Figure 5.

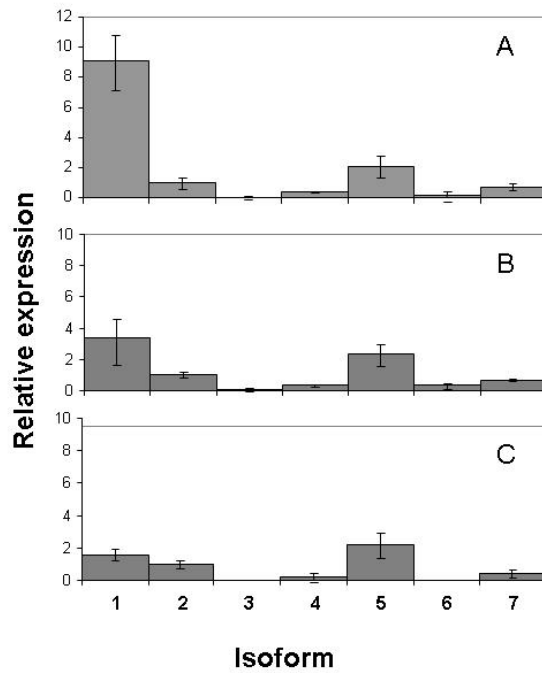

**Figure S3.** Expression of *LjINV* genes in the *inv1-1* mutant. Relative abundance of different N/A invertase transcripts in the lines segregating for the *inv1-1* mutant allele. A, wild type; B, heterozygote; C, mutant. The relative amounts of *LjINV1* to *LjINV7* were analysed by qRT-PCR in shoot tips (3 replicates). Transcript levels were expressed relative to the level in *LjINV2* after normalization to the levels of EF-1 $\alpha$ . Note the asymmetrical distribution of the SD caused by the conversion of the exponential process into a linear comparison (Livak and Schmittgen, 2001).

### Supplementary tables

**Table S1.** Subcellular location data for *L. japonicus* invertase isoforms. M= mitochondion; P= plastid

| Gene          | Length (aa) |           | Prediction Tool |       |            |         |         | Localization |
|---------------|-------------|-----------|-----------------|-------|------------|---------|---------|--------------|
|               |             |           | Predotar        | PSORT | Mitprot II | TargetP | ChloroP |              |
| <i>LjINV2</i> | 621         | Mitochon. | 0.27            | 0.81  | 0.99       | 0.54    |         | M/P          |
|               |             | Plastid   | 0.02            | 0.49  |            | 0.54    | 0.56    |              |
| <i>LjINV3</i> | 668         | Mitochon. | 0.42            |       | 1.00       | 0.01    |         | M/P          |
|               |             | Plastid   | 0.46            |       | .          | 0.95    | 0.57    |              |
| <i>LjINV4</i> | 838         | Mitochon. | 0.03            | 0.73  | 1.00       | 0.07    |         | M/P          |
|               |             | Plastid   | 0.35            | 0.52  |            | 0.75    | 0.52    |              |
| <i>LjINV5</i> | 640         | Mitochon. | 0.05            |       | 0.57       | 0.03    |         |              |
|               |             | Plastid   | 0.08            |       |            | 0.24    | 0.51    |              |
| <i>LjINV1</i> | 556         | Mitochon. | 0.01            | 0.10  | 0.01       | 0.07    |         |              |
|               |             | Plastid   | 0.00            | 0.10  |            | 0.18    | 0.44    |              |
| <i>LjINV7</i> | 572         | Mitochon. | 0.01            | 0.10  | 0.047      | 0.03    |         |              |
|               |             | Plastid   | 0.01            |       |            | 0.57    | 0.46    |              |

**Table S2.** *L. japonicus* *INV1* alleles, their sequence differences to the wild type and Position Specific Scoring Matrix (PSSM) scores

| Plant number | Allele         | Nucleotide change | Amino acid change | PSSM Difference |
|--------------|----------------|-------------------|-------------------|-----------------|
| SL5864-1     | <i>inv1-1</i>  | C2047T            | Q 329 *           |                 |
| SL5331-1     | <i>inv1-2</i>  | G2426A            | G 455 E           | 15.4            |
| SL3337-1     | <i>inv1-3</i>  | G2168A            | G 369 D           | 13.2            |
| SL3485-1     | <i>inv1-4</i>  | C2158T            | P 366 S           | 13.7            |
| SL1461-1     | <i>inv1-5</i>  | G2206A            | D 382 N           | 10.2            |
| SL761-1      | <i>inv1-6</i>  | C2263T            | P 401 S           | 8.1             |
| SL769-1      | <i>inv1-7</i>  | C1961T            | A 300 V           |                 |
| SL1178-1     | <i>inv1-8</i>  | C1604T            | intron            |                 |
| SL4132-1     | <i>inv1-9</i>  | G2149A            | D 363 N           | 9.9             |
| SL5951-1     | <i>inv1-10</i> | C1576T            | intron            |                 |

**Table S3.** *L. japonicus* *INV2* alleles, their sequence differences to the wild type and Position Specific Scoring Matrix (PSSM) scores

| Plant number | Allele        | Nucleotide change | Amino acid change | PSSM Difference |
|--------------|---------------|-------------------|-------------------|-----------------|
| SL174-1      | <i>inv2-1</i> | G2533A            | W464*             |                 |
| SL379-1      | <i>inv2-2</i> | G2240A            | R370K             | 8.3             |
| SL379-2      | <i>inv2-2</i> | G2240A            | R370K             | 8.3             |
| SL1897-1     | <i>inv2-3</i> | C2328T            | F399=             |                 |
| SL3388-1     | <i>inv2-4</i> | C2598T            | T489=             |                 |
| SL1870-1     | <i>inv2-5</i> | G2623A            | intron            |                 |
| SL1959-1     | <i>inv2-6</i> | C2626T            | intron            |                 |
| SL1585-1     | <i>inv2-7</i> | C1610T            | I266=             |                 |
| SL500-1      | <i>inv2-8</i> | G1776A            | G322S             | 12.1            |
| SL717-1      | <i>inv2-8</i> | G1776A            | G322S             | 12.1            |
| SL719-1      | <i>inv2-8</i> | G1776A            | G322S             | 12.1            |
| SL253-1      | <i>inv2-9</i> | 1887T             | intron            |                 |
